# Supplementary material for: Access to Healthcare for Migrant Patients in Europe: Healthcare Discrimination and Translation Services
Source: MDPI journal article supplement (doi:10.3390/ijerph18157901), 2021-07-26
Supplement: s1 [file s1]

**Supplementary Table S1.** DMS questionnaire. Each question of the DMS scale scores from 1: Never true to 5: Always true.

| Question |                                                                           |
|----------|---------------------------------------------------------------------------|
| Q1       | You are treated with less courtesy than other people.                     |
| Q2       | You are treated with less respect than other people.                      |
| Q3       | You receive poorer service than others.                                   |
| Q4       | A doctor or nurse acts as if he or she thinks you are not smart.          |
| Q5       | A doctor or nurse acts as if he or she is afraid of you.                  |
| Q6       | A doctor or nurse acts as if he or she is better than you.                |
| Q7       | You feel like a doctor or nurse is not listening to what you were saying. |

**Supplementary Table S2.** Pearson's correlation and Cronbach's diagonal results for each question with total DMS scale. Migrants and refugees from Germany, France and Malta were excluded from the analysis.

| <i>Pearson correlations*</i> | <i>DMS scale</i> | <i>Q1</i> | <i>Q2</i> | <i>Q3</i> | <i>Q4</i> | <i>Q5</i> | <i>Q6</i> | <i>Q7</i> |
|------------------------------|------------------|-----------|-----------|-----------|-----------|-----------|-----------|-----------|
| <i>DMS scale</i>             | 1.0000           |           |           |           |           |           |           |           |
| <i>Q1</i>                    | 0.8171           | 1.0000    |           |           |           |           |           |           |
| <i>Q2</i>                    | 0.8576           | 0.7718    | 1.0000    |           |           |           |           |           |
| <i>Q3</i>                    | 0.8190           | 0.6490    | 0.6932    | 1.0000    |           |           |           |           |
| <i>Q4</i>                    | 0.8431           | 0.5707    | 0.6424    | 0.6170    | 1.0000    |           |           |           |
| <i>Q5</i>                    | 0.7944           | 0.5338    | 0.6159    | 0.5852    | 0.7043    | 1.0000    |           |           |
| <i>Q6</i>                    | 0.8701           | 0.6459    | 0.6911    | 0.6486    | 0.7254    | 0.6623    | 1.0000    |           |
| <i>Q7</i>                    | 0.8261           | 0.6027    | 0.6132    | 0.5831    | 0.6709    | 0.6109    | 0.7234    | 1.000     |
| <i>Cronbach's a</i>          | 0.9273           | 0.9185    | 0.9128    | 0.9184    | 0.915     | 0.9198    | 0.9112    | 0.9178    |

\* $p < 0.001$  in all correlations

**Supplementary Table S3.** Pearson's correlation and Cronbach's diagonal results for each question with total Mental Health Score. Migrants and refugees from Germany, France and Malta were excluded from the analysis.

|                                                                            | <i>Pearson correlations*</i> | <i>Cronbach's a</i> |
|----------------------------------------------------------------------------|------------------------------|---------------------|
| <i>Have you been a very nervous person?</i>                                | 0.6319                       | 0.7448              |
| <i>Have you felt so down in the dumps that nothing could cheer you up?</i> | 0.7872                       | 0.6643              |
| <i>Have you felt calm and peaceful?</i>                                    | -0.6950                      | 0.7193              |
| <i>Have you felt downhearted and blue?</i>                                 | 0.7826                       | 0.6679              |
| <i>Have you been a happy person?</i>                                       | -0.6548                      | 0.7361              |
| <i>Total Mental Health Score</i>                                           | 1.0000                       | 0.7521              |

\* $p < 0.001$  in all correlations

**Supplementary Table S4.** Characteristics of the total sample of migrants and refugees (N=1407).

|                             | <i>N (%)</i> |
|-----------------------------|--------------|
| <i>Country of interview</i> |              |
| Austria                     | 126 (8.96)   |
| Germany                     | 11 (0.78)    |
| Bulgaria                    | 226 (16.06)  |
| Cyprus                      | 110 (7.82)   |
| France                      | 64 (4.55)    |
| Greece                      | 255 (18.12)  |
| Italy                       | 271 (19.26)  |
| Malta                       | 38 (2.7)     |

|                                                    |                           |
|----------------------------------------------------|---------------------------|
| Spain                                              | 202 (14.36)               |
| Sweden                                             | 104 (7.39)                |
| Country of origin                                  |                           |
| Afghanistan                                        | 211 (15.18)               |
| Iran                                               | 48 (3.45)                 |
| Iraq                                               | 127 (9.14)                |
| Nigeria                                            | 118 (8.49)                |
| Syria                                              | 294 (21.15)               |
| Other                                              | 592 (42.59)               |
| Gender (Males)                                     | 889 (63.45)               |
| Having at least one child                          | 575 (50.26)               |
| Asylum (Yes)                                       | 358 (28.94)               |
| Other kind of permission (Yes)                     | 619 (46.37)               |
| Speaking country of interview language (Yes)       | 484 (40.27)               |
| Comorbidity                                        |                           |
| Not having a disease or chronic condition          | 713 (50.68)               |
| Having one disease or chronic condition            | 334 (23.74)               |
| Having at least two diseases or chronic conditions | 360 (25.59)               |
|                                                    | Mean ± Standard deviation |
| Age (years)                                        | 31.98±11.05               |
| Education (years)                                  | 9.1±5                     |

**Supplementary Table S5.** Communication skills by country of origin and country of interview. Migrants without DMS score (missing values) were excluded from the analysis.

|                             | Not speaking country of interview language | Speaking country of interview language |
|-----------------------------|--------------------------------------------|----------------------------------------|
| Country of origin (%)***    |                                            |                                        |
| Afghanistan                 | 27 (79.41)                                 | 7 (20.59)                              |
| Iran                        | 14 (70)                                    | 6 (30)                                 |
| Iraq                        | 58 (84.06)                                 | 11 (15.94)                             |
| Nigeria                     | 25 (50)                                    | 25 (50)                                |
| Syria                       | 144 (87.8)                                 | 20 (12.2)                              |
| Other                       | 105 (34.54)                                | 199 (65.46)                            |
| Country of interview (%)*** |                                            |                                        |
| Austria                     | 64 (70.33)                                 | 27 (29.67)                             |
| Bulgaria                    | 48 (96)                                    | 2 (4)                                  |
| Cyprus                      | 61 (98.39)                                 | 1 (1.61)                               |
| Greece                      | 119 (95.2)                                 | 6 (4.8)                                |
| Italy                       | 49 (44.95)                                 | 60 (55.05)                             |
| Spain                       | 10 (6.25)                                  | 150 (93.75)                            |
| Sweden                      | 25 (52.08)                                 | 23 (47.92)                             |

\*\*\*  $p < 0.001$ , \*\*  $p < 0.05$ , \*  $p < 0.1$
